# Supplementary material for: Carbonyl group-dependent high-throughput screening and enzymatic characterization of diaromatic ketone reductase
Source: Royal Society of Chemistry journal article supplement (doi:10.1039/c6cy00922k), 2016-01-01
Supplement: c6cy00922k1.pdf [file c6cy00922k1.pdf]

## Electronic Supplementary Information

### Carbonyl group-dependent high-throughput screening and enzymatic characterization of diaromatic ketone reductase

Jieyu Zhou, Guochao Xu, Ruizhi Han, Jinjun Dong, Weiguo Zhang, Rongzhen Zhang,

Ye Ni\*

*The Key Laboratory of Industrial Biotechnology, Ministry of Education, School of Biotechnology,  
Jiangnan University, Wuxi 214122, Jiangsu, China*

\*Corresponding author. Tel/Fax: +86-510-85329265; E-mail: [yni@jiangnan.edu.cn](mailto:yni@jiangnan.edu.cn)

|                                                                                                                                                                                                                                    |        |
|------------------------------------------------------------------------------------------------------------------------------------------------------------------------------------------------------------------------------------|--------|
| <b>Figure S1</b> Absorbance spectra of CPMK (☞), crude extracts of <i>E. coli</i> BL21(DE3)/pET28a (☞), <i>E. coli</i> BL21(DE3)/pET28a- <i>gdh</i> (☞), <i>E. coli</i> BL21(DE3)/pET28a- <i>kpadh</i> (☞) using DNPH method. .... | S2     |
| <b>Figure S2</b> Flow chart of random mutagenesis, screening and characterization of <i>KpADH</i> variants using DNPH method. ....                                                                                                 | S3     |
| <b>Figure S3</b> Purification and kinetic analysis of <i>KpADH</i> . ....                                                                                                                                                          | S4     |
| <b>Figure S4</b> Purification and kinetic analysis of <i>KpADH</i> <sub>M131F</sub> . ....                                                                                                                                         | S5     |
| <b>Figure S5</b> Purification and kinetic analysis of <i>KpADH</i> <sub>S196Y</sub> . ....                                                                                                                                         | S6     |
| <b>Figure S6</b> Purification and kinetic analysis of <i>KpADH</i> <sub>S237A</sub> . ....                                                                                                                                         | S7     |
| <b>Figure S7</b> Homology structure of <i>KpADH</i> using crystal structure of yeast methylglyoxal/isovaleraldehyde reductase (PDB: 4PVC) as template. ....                                                                        | S8     |
| <b>Figure S8–S23</b> Absorbance at 500 nm of <b>1a–16a</b> with different concentrations. ....                                                                                                                                     | S9–S24 |
| <b>Table S1</b> Substrate specificities of <i>KpADH</i> and its variants M131F, S196A and S237A. ....                                                                                                                              | S25    |
| <b>Table S2</b> Conversion of <i>KpADH</i> , M131F, S196A and S237A toward prochiral ketones. ....                                                                                                                                 | S26    |

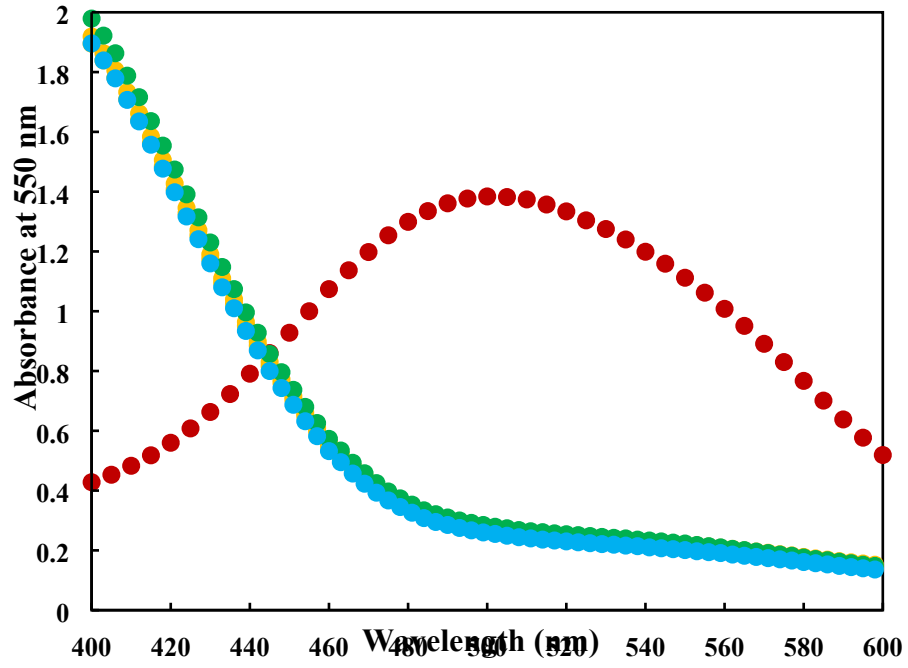

**Figure S1** Absorbance spectra of CPMK (red), crude extracts of *E. coli* BL21(DE3)/pET28a (blue), *E. coli* BL21(DE3)/pET28a-gdh (yellow), *E. coli* BL21(DE3)/pET28a-kpadh (green), using DNPH method.

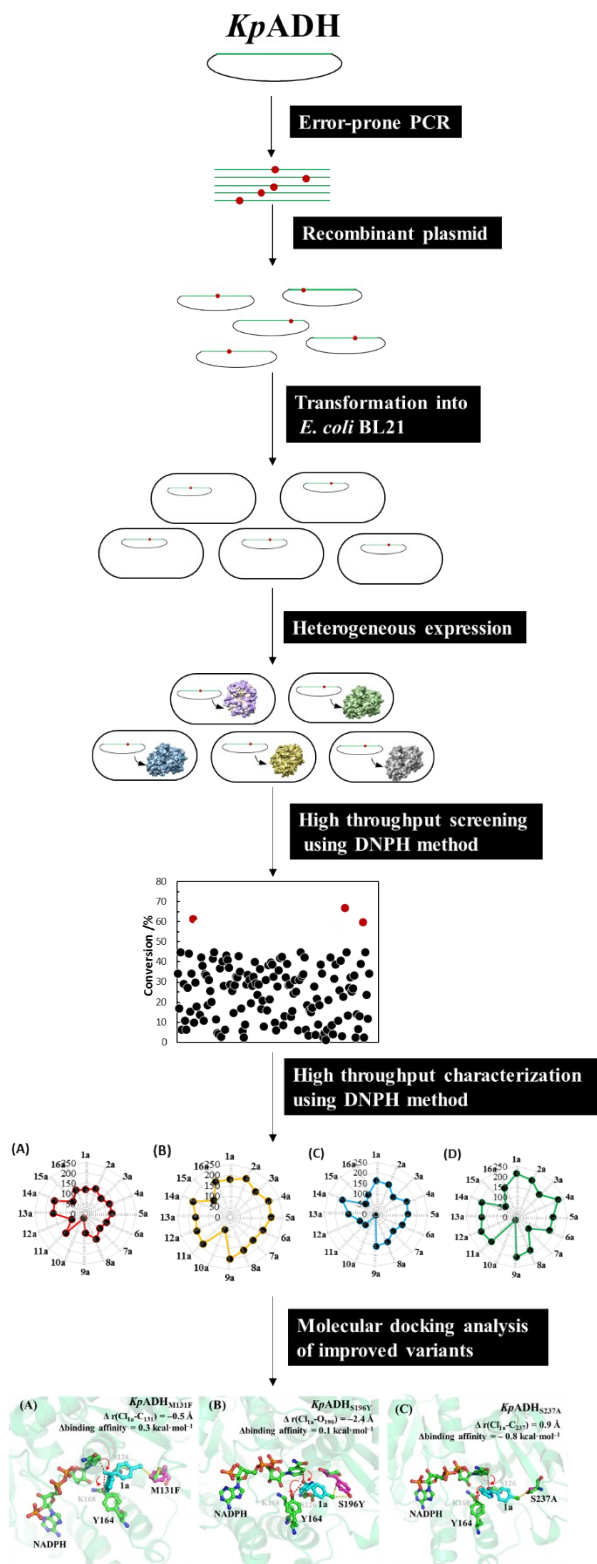

**Figure S2** Flow chart of random mutagenesis, screening and characterization of *KpADH* variants using DNP method.

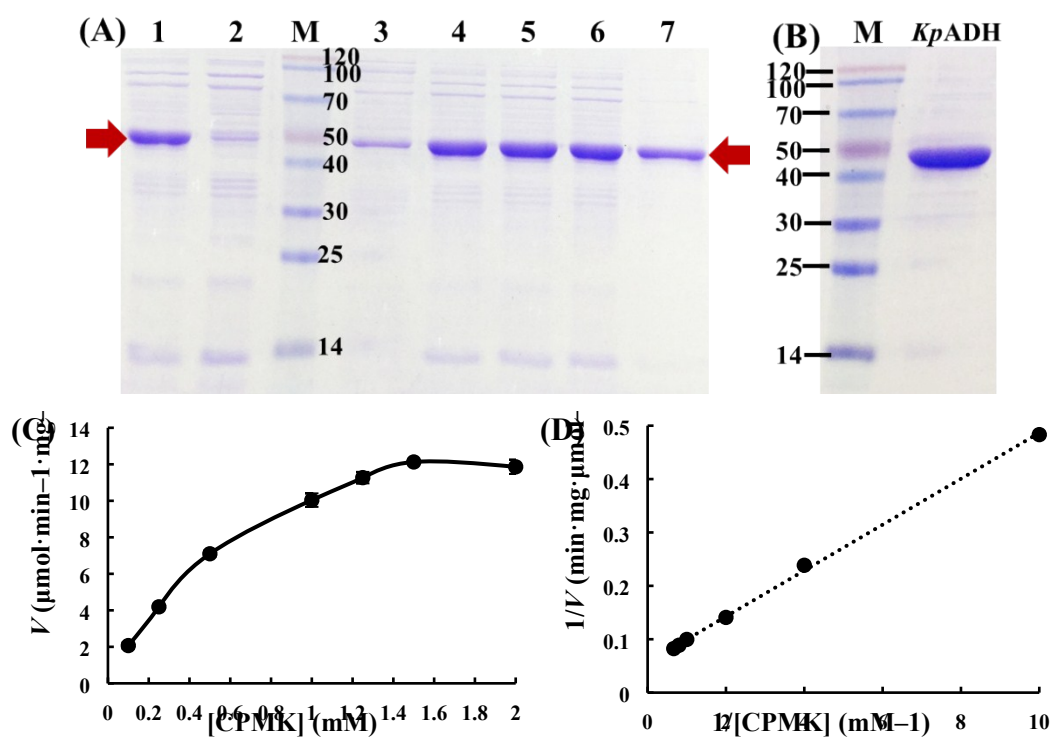

**Figure S3** Purification and kinetic analysis of *KpADH*. (A) Purification of *KpADH*; lane 1: crude extract of *KpADH*, lane 2: flow-through of nickel column, lane 3: eluent with 50 mM imidazole, lanes 4–7: eluents with 100 mM imidazole, lane 7: eluent with 300 mM imidazole, lane M: protein molecular marker. (B) SDS-PAGE of purified *KpADH*. (C) Effect of CPMK concentration on the initial velocity of *KpADH*. (D) Lineweaver-Burk plot of *KpADH*.

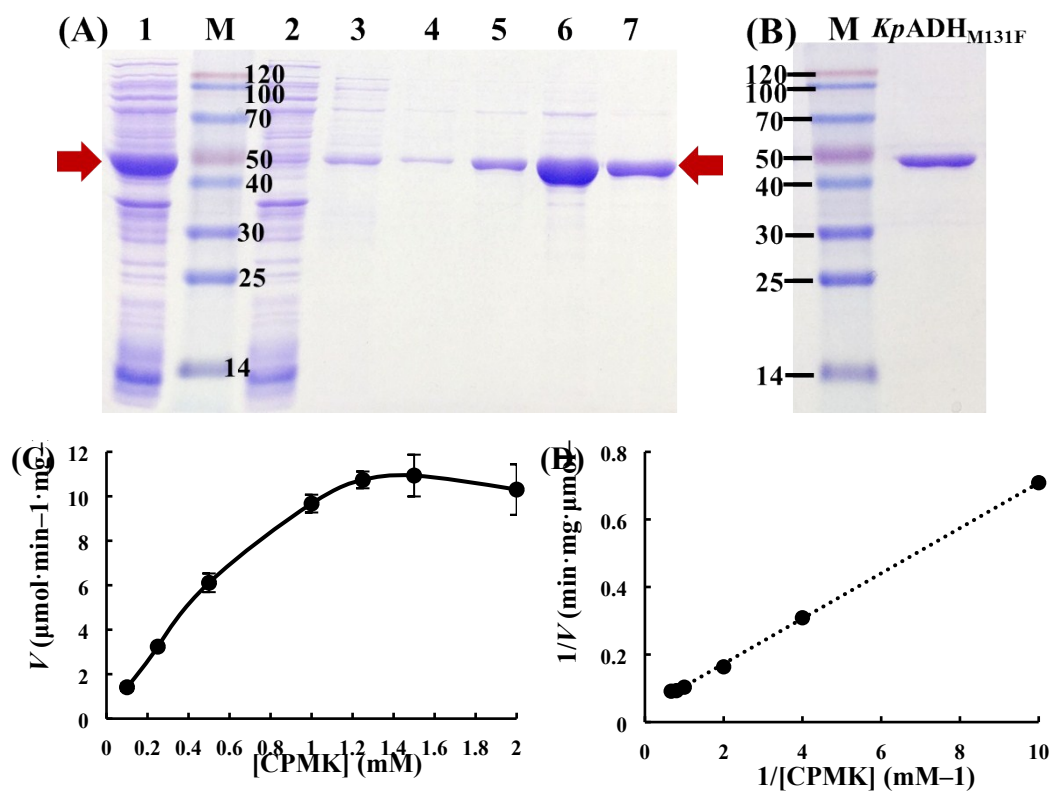

**Figure S4** Purification and kinetic analysis of  $KpADH_{M131F}$ . (A) Purification of  $KpADH_{M131F}$ ; lane 1: crude extract of  $KpADH_{M131F}$ , lane 2: flow-through of nickel column, lane 3: eluent with 50 mM imidazole, lanes 4–7: eluents with 100 mM imidazole, lane 7: eluent with 300 mM imidazole, lane M: protein molecular marker. (B) SDS-PAGE of purified  $KpADH_{M131F}$ . (C) Effect of CPMK concentration on the initial velocity of  $KpADH_{M131F}$ . (D) Lineweaver-Burk plot of  $KpADH_{M131F}$ .

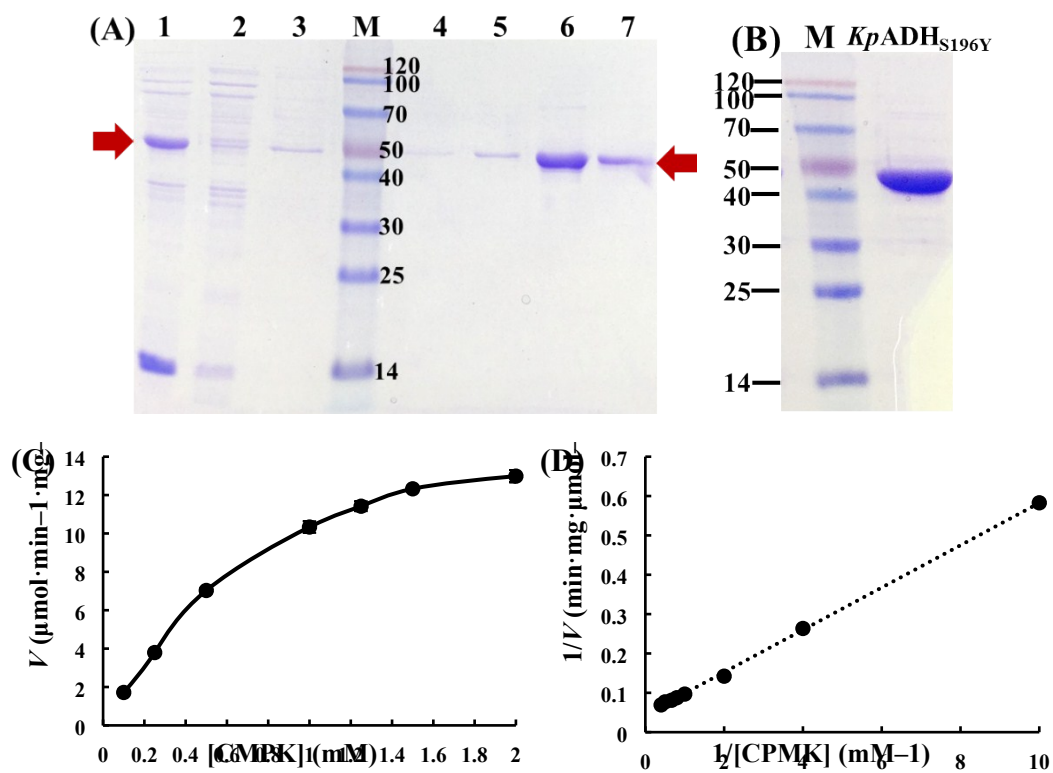

**Figure S5** Purification and kinetic analysis of *KpADH*<sub>S196Y</sub>. (A) Purification of *KpADH*<sub>S196Y</sub>; lane 1: crude extract of *KpADH*<sub>S196Y</sub>, lane 2: flow-through of nickel column, lane 3: eluent with 50 mM imidazole, lanes 4–7: eluents with 100 mM imidazole, lane 7: eluent with 300 mM imidazole, lane M: protein molecular marker. (B) SDS-PAGE of purified *KpADH*<sub>S196Y</sub>. (C) Effect of CPMK concentration on the initial velocity of *KpADH*<sub>S196Y</sub>. (D) Lineweaver-Burk plot of *KpADH*<sub>S196Y</sub>.

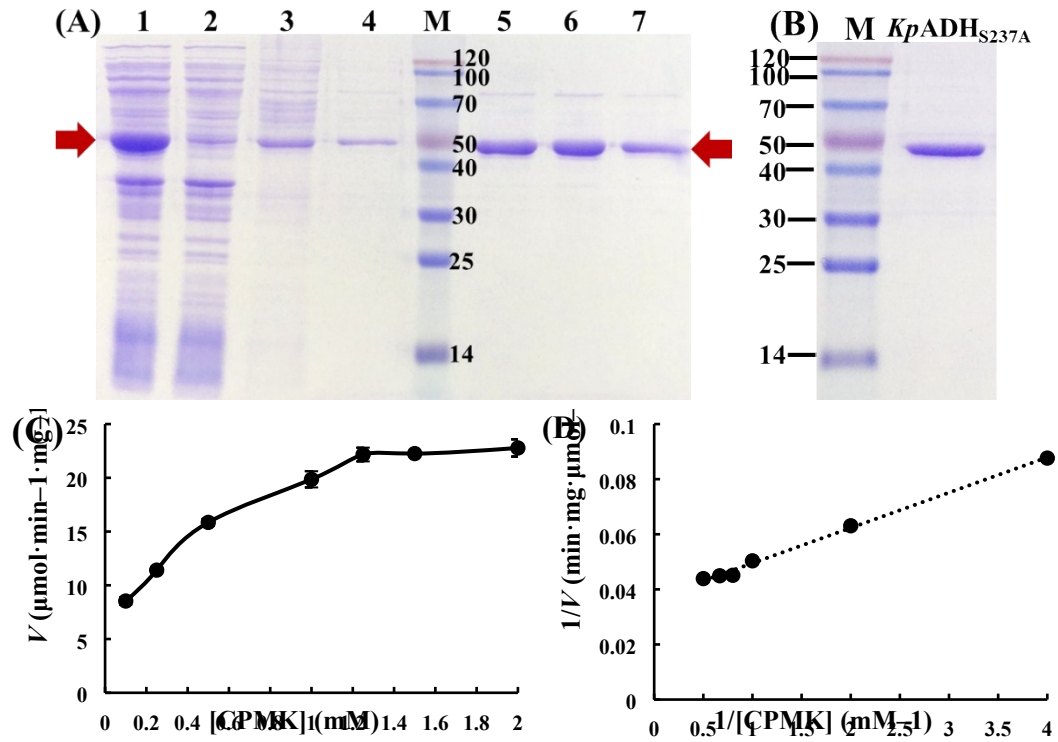

**Figure S6** Purification and kinetic analysis of *KpADH*<sub>S237A</sub>. (A) Purification of *KpADH*<sub>S237A</sub>; lane 1: crude extract of *KpADH*<sub>S237A</sub>, lane 2: flow-through of nickel column, lane 3: eluent with 50 mM imidazole, lanes 4–7: eluents with 100 mM imidazole, lane 7: eluent with 300 mM imidazole, lane M: protein molecular marker. (B) SDS-PAGE of purified *KpADH*<sub>S237A</sub>. (C) Effect of CPMK concentration on the initial velocity of *KpADH*<sub>S237A</sub>. (D) Lineweaver-Burk plot of *KpADH*<sub>S237A</sub>.

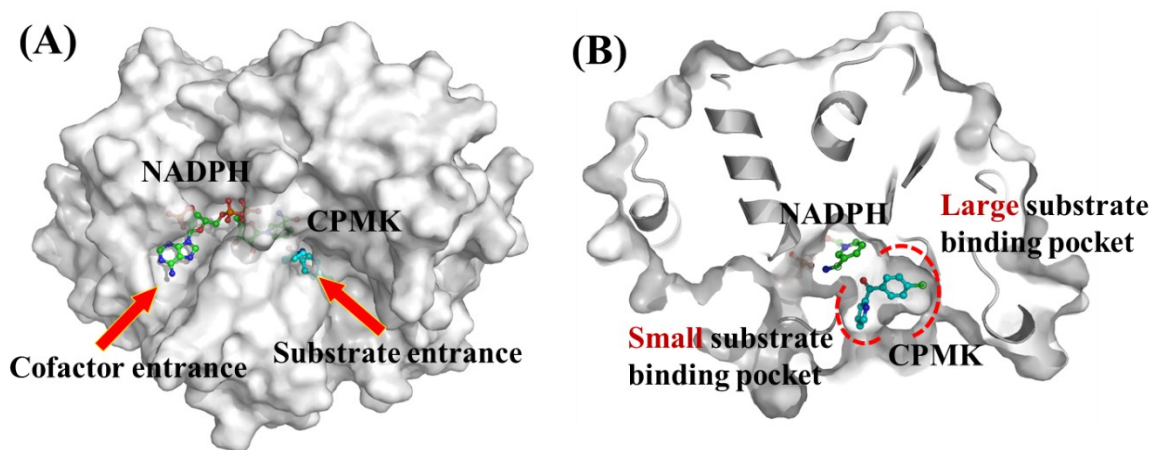

**Figure S7** Homology structure of *KpADH* using crystal structure of yeast methylglyoxal/isovaleraldehyde reductase (PDB: 4PVC) as template. (A) Overall structure of *KpADH*. (B) Large and small substrate binding pockets. NADPH was depicted in green, CPMK was shown in cyan.



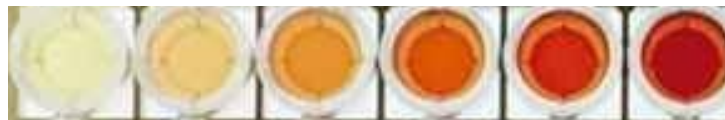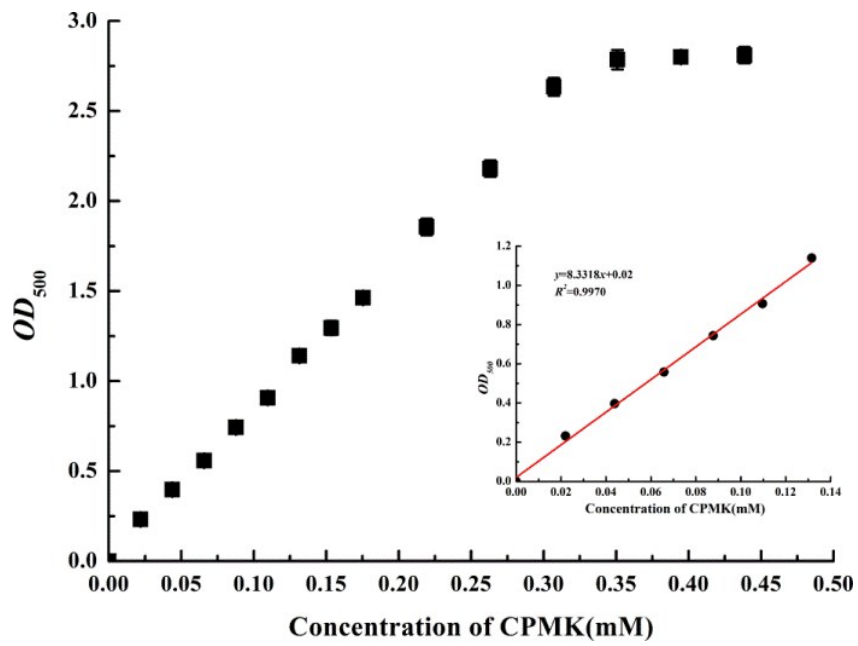

Figure S8 Absorbance at 500 nm of CPMK with different concentrations.

**2a**

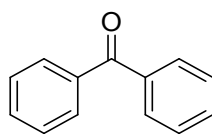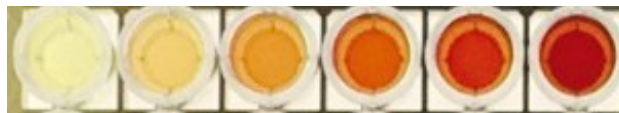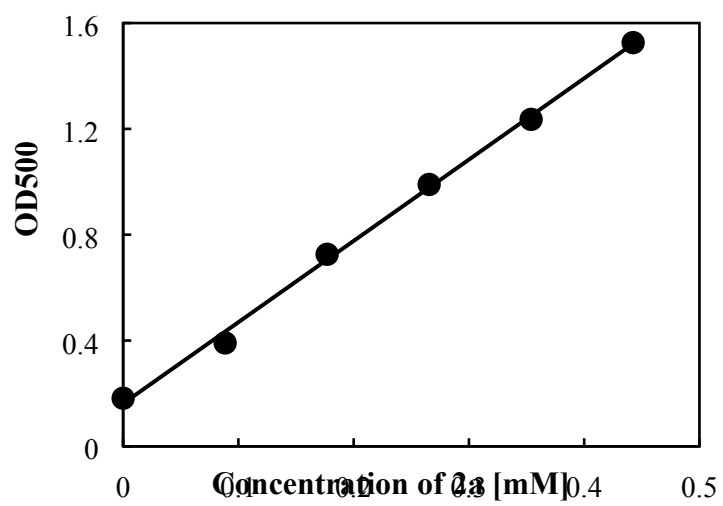

**Figure S9** Standard curve of **2a** using DNPH method

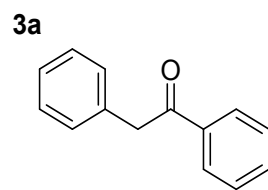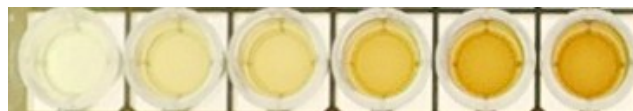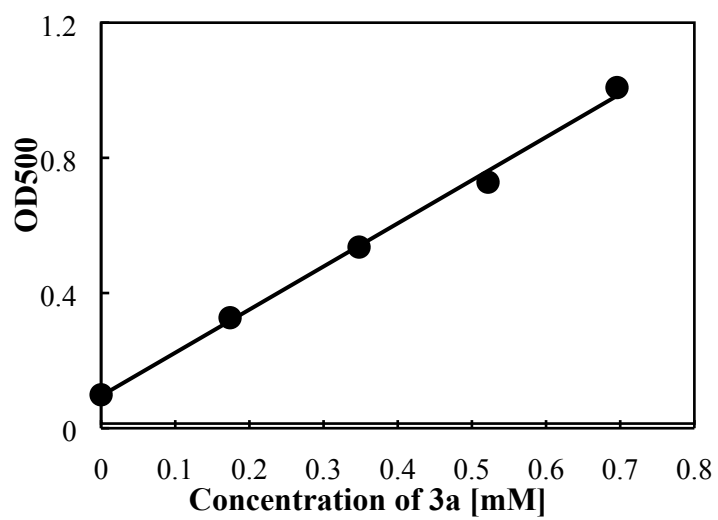

**Figure S10** Standard curve of **3a** using DNPH method.

**4a**

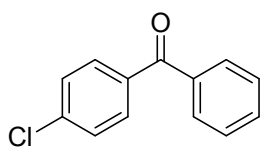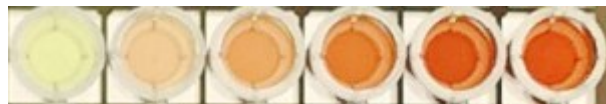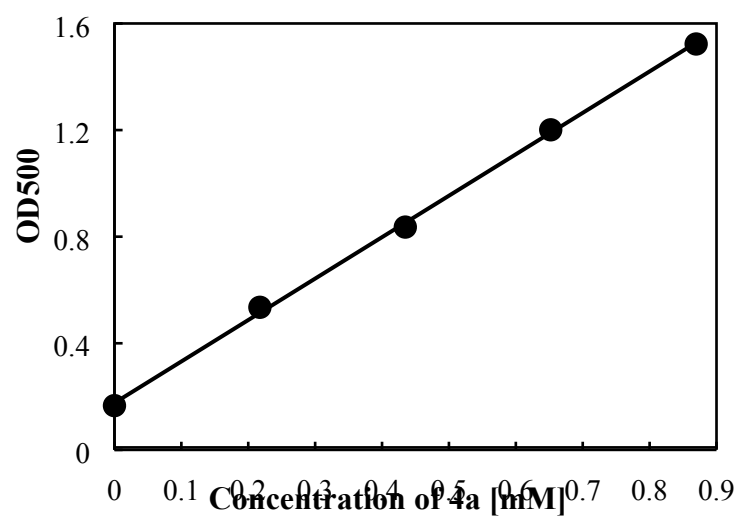

**Figure S11** Standard curve of **4a** using DNPH method.

**5a**

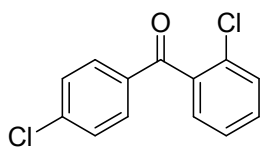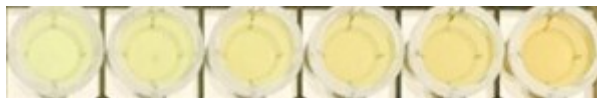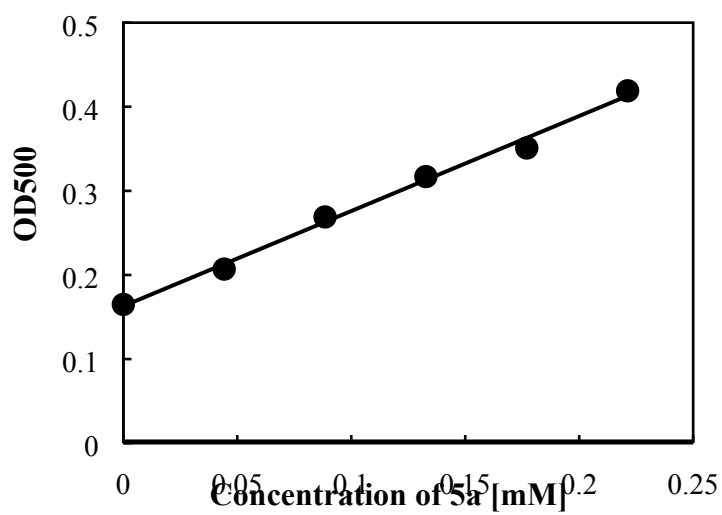

**Figure S12** Standard curve of **5a** using DNPH method.

6a

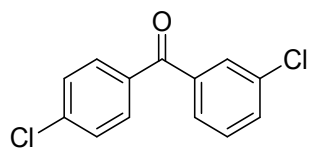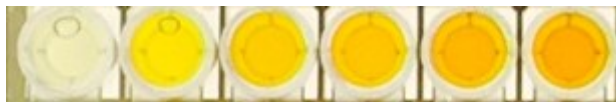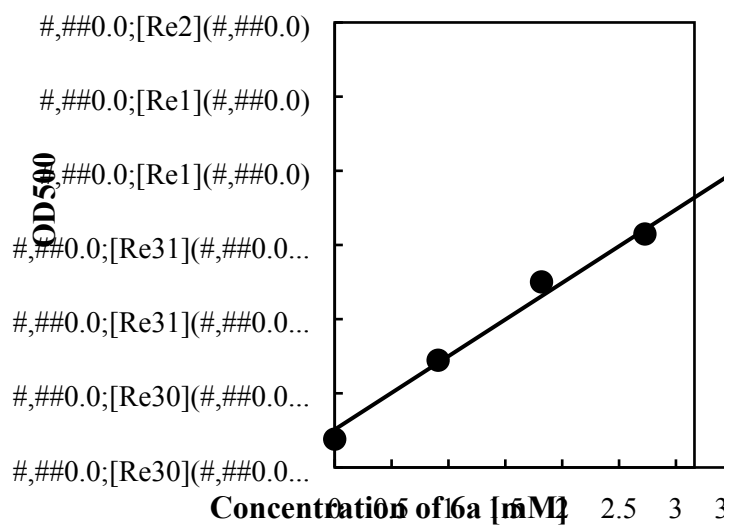

Figure S13 Standard curve of 6a using DNPH method.

**7a**

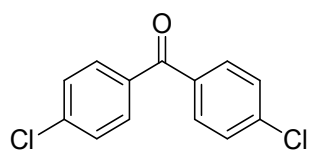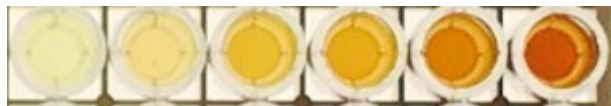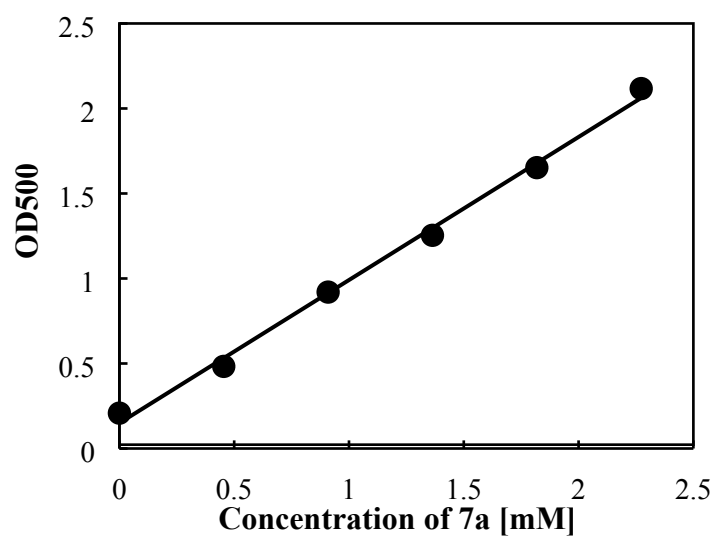

**Figure S14** Standard curve of **7a** using DNPH method.

**8a**

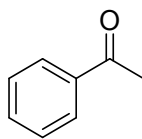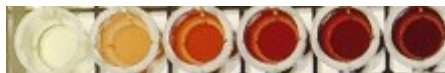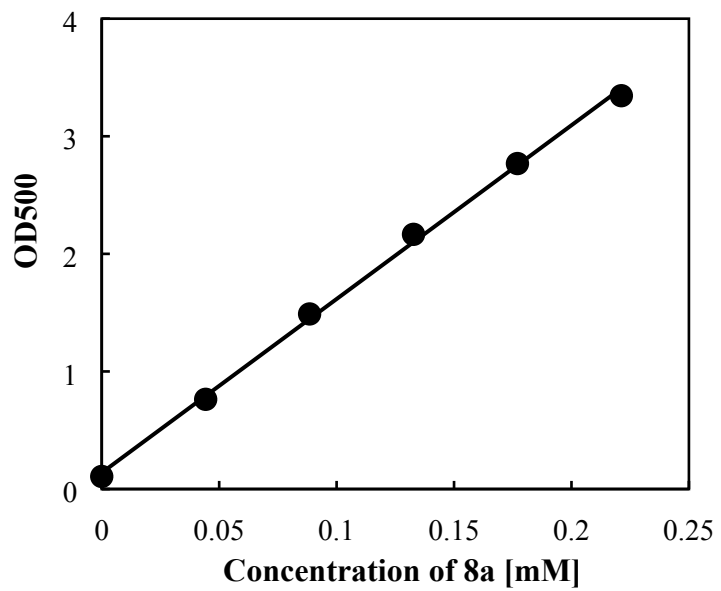

**Figure S15** Standard curve of **8a** using DNPH method.



**9a**

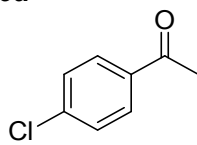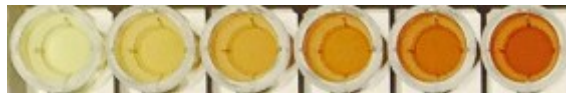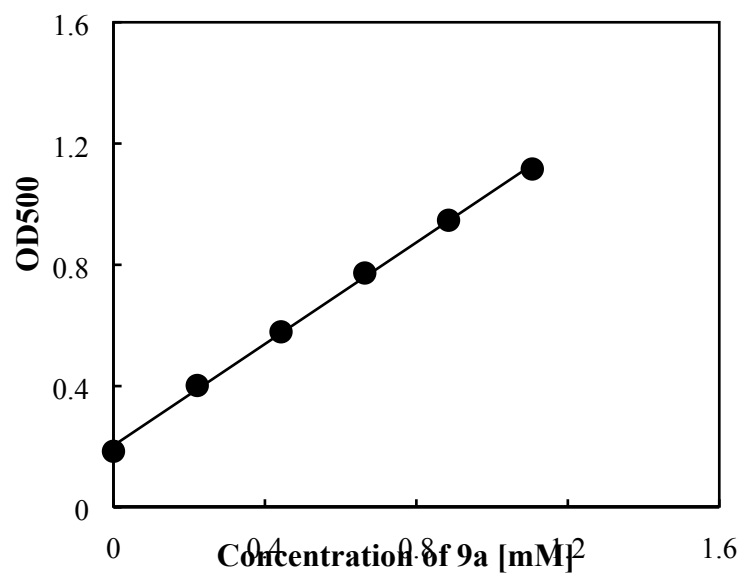

**Figure S16** Standard curve of **9a** using DNPH method.

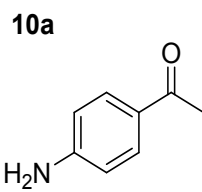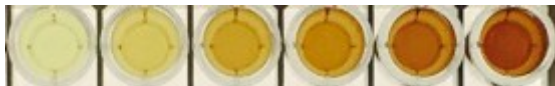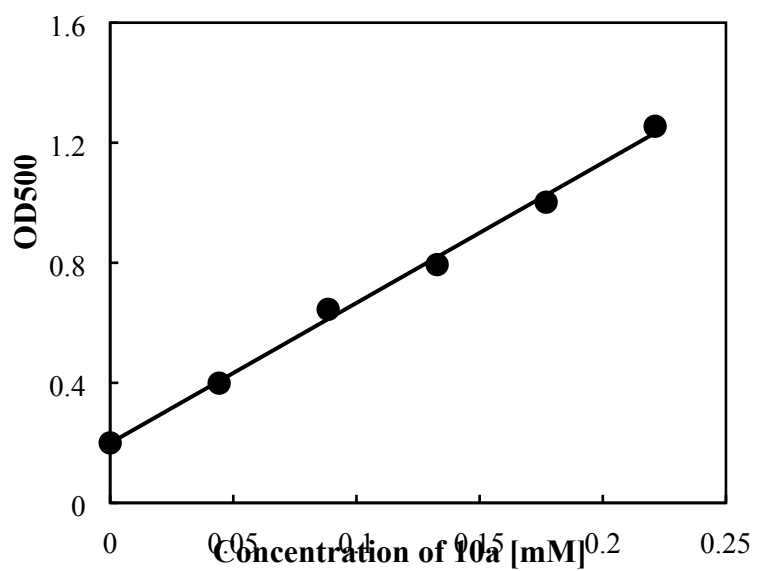

**Figure S17** Standard curve of **10a** using DNPH method.

**11a**

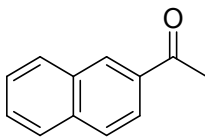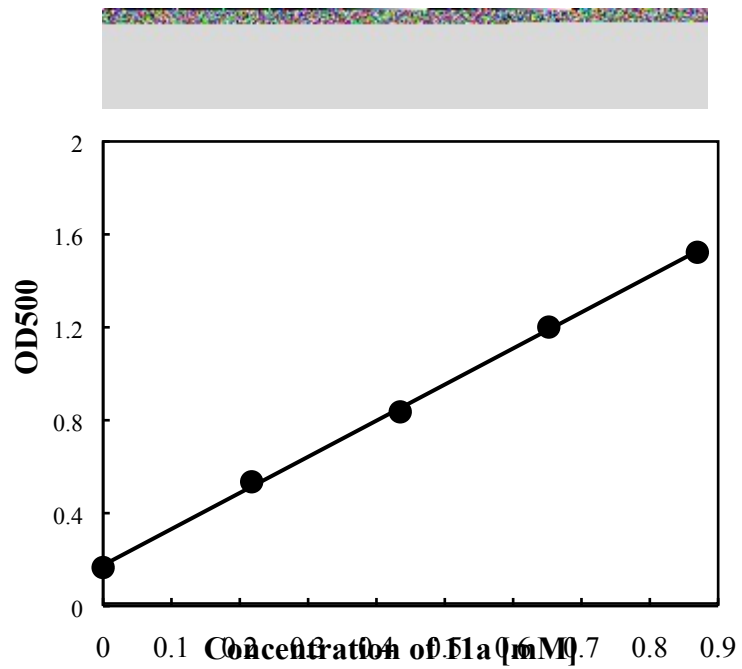

**Figure S18** Standard curve of 11a using DNPH method.

12a

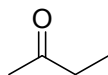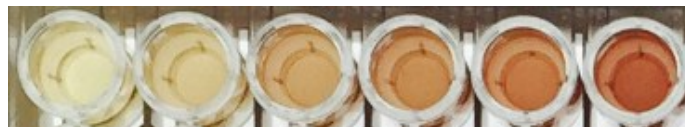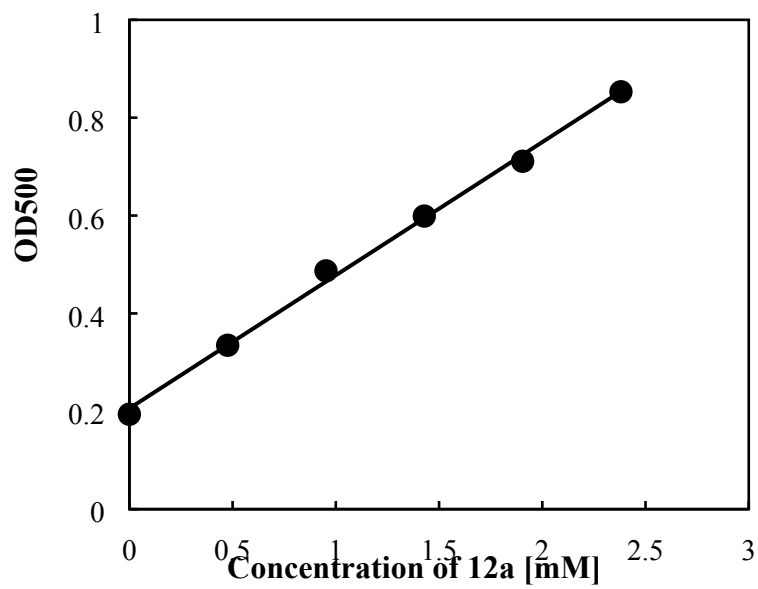

Figure S19 Standard curve of 12a using DNPH method.

**13a**

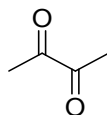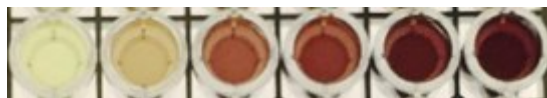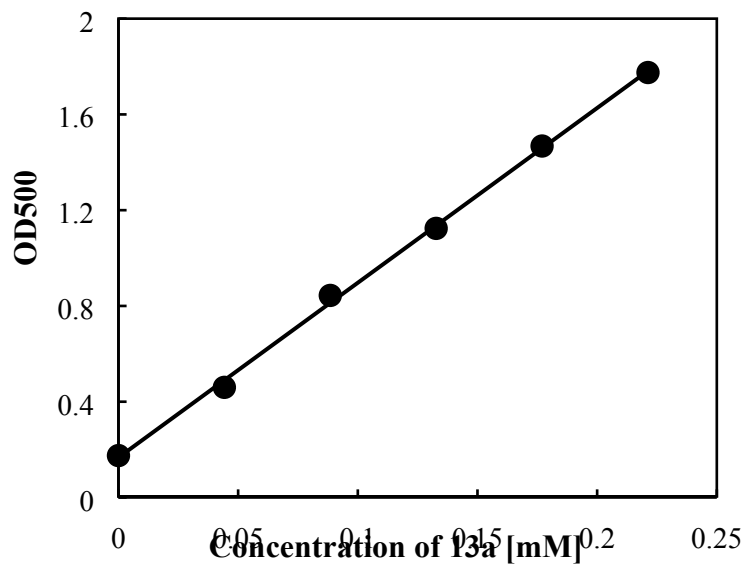

**Figure S20** Standard curve of **13a** using DNPH method.

14a

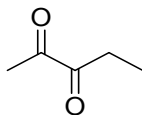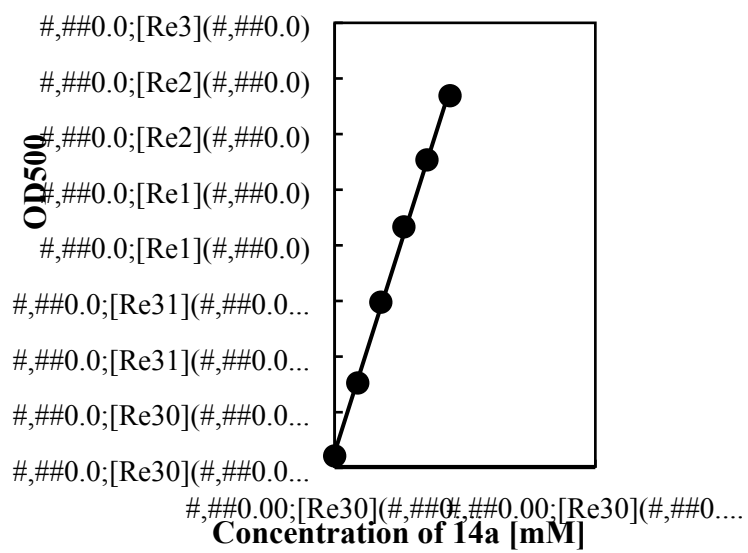

Figure S21 Standard curve of 14a using DNPH method.

15a

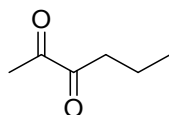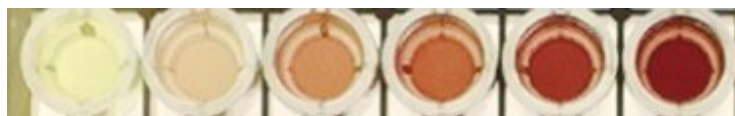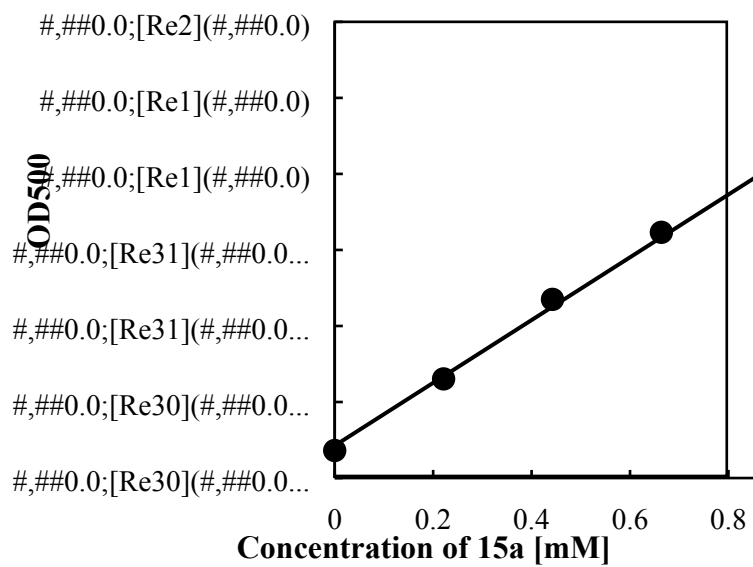

Figure S22 Standard curve of 15a using DNPH method.

**16a**

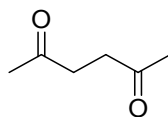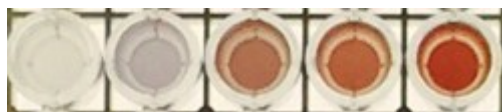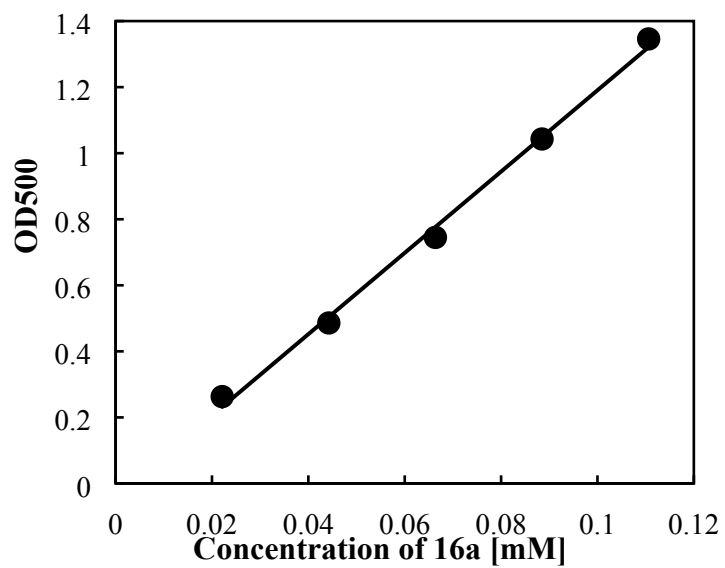

**Figure S23** Standard curve of **16a** using DNPH method.



**Table S1** Substrate specificities of *Kp*ADH and its variants M131F, S196A and S237A.

| Substrate  | <i>Kp</i> ADH<br>[U/g wet cell] | M131F<br>[U/g wet cell] | S196Y<br>[U/g wet cell] | S237A<br>[U/g wet cell] |
|------------|---------------------------------|-------------------------|-------------------------|-------------------------|
| <b>S1</b>  | 118 ± 6                         | 181 ± 9                 | 161 ± 8                 | 215 ± 6                 |
| <b>S2</b>  | 131 ± 8                         | 197 ± 5                 | 155 ± 7                 | 198 ± 5                 |
| <b>S3</b>  | 107 ± 6                         | 172 ± 6                 | 118 ± 3                 | 158 ± 8                 |
| <b>S4</b>  | 128 ± 5                         | 199 ± 8                 | 159 ± 5                 | 223 ± 6                 |
| <b>S5</b>  | 129 ± 5                         | 194 ± 7                 | 152 ± 4                 | 179 ± 9                 |
| <b>S6</b>  | 111 ± 8                         | 168 ± 8                 | 137 ± 5                 | 176 ± 6                 |
| <b>S7</b>  | 101 ± 5                         | 155 ± 5                 | 115 ± 6                 | 83 ± 4                  |
| <b>S8</b>  | 137 ± 5                         | 169 ± 5                 | 144 ± 5                 | 178 ± 6                 |
| <b>S9</b>  | 95 ± 5                          | 198 ± 8                 | 156 ± 5                 | 199 ± 8                 |
| <b>S10</b> | 23 ± 3                          | 64 ± 3                  | 4 ± 1                   | 16 ± 3                  |
| <b>S11</b> | 136 ± 6                         | 182 ± 5                 | 72 ± 4                  | 175 ± 5                 |
| <b>S12</b> | 72 ± 4                          | 169 ± 6                 | 84 ± 3                  | 189 ± 6                 |
| <b>S13</b> | 159 ± 8                         | 164 ± 6                 | 133 ± 7                 | 173 ± 6                 |
| <b>S14</b> | 163 ± 6                         | 191 ± 5                 | 178 ± 6                 | 188 ± 4                 |
| <b>S15</b> | 86 ± 4                          | 111 ± 5                 | 70 ± 3                  | 75 ± 4                  |
| <b>S16</b> | 125 ± 6                         | 181 ± 4                 | 100 ± 5                 | 156 ± 3                 |

**Table S2** Conversion of *Kp*ADH, M131F, S196A and S237A toward prochiral ketones.

| Substrate  | <i>Kp</i> ADH<br>[%] | M131F<br>[%] | S196Y<br>[%] | S237A<br>[%] |
|------------|----------------------|--------------|--------------|--------------|
| <b>S1</b>  | 47.2 ± 2.4           | 72.3 ± 3.6   | 64.6 ± 3.2   | 86.2 ± 2.3   |
| <b>S2</b>  | 52.4 ± 3.0           | 78.7 ± 2.0   | 61.9 ± 2.7   | 79.2 ± 2.0   |
| <b>S3</b>  | 43.0 ± 2.4           | 68.7 ± 2.4   | 47.3 ± 1.4   | 63.2 ± 3.2   |
| <b>S4</b>  | 51.3 ± 2.2           | 79.6 ± 3.2   | 63.6 ± 2.0   | 89.3 ± 2.5   |
| <b>S5</b>  | 51.6 ± 2.0           | 77.4 ± 3.0   | 60.9 ± 1.7   | 71.8 ± 3.6   |
| <b>S6</b>  | 44.5 ± 3.0           | 67.1 ± 3.0   | 54.7 ± 2.0   | 70.3 ± 2.5   |
| <b>S7</b>  | 40.5 ± 2.1           | 62.0 ± 2.1   | 46.2 ± 2.6   | 33.2 ± 1.7   |
| <b>S8</b>  | 54.7 ± 1.8           | 67.7 ± 1.5   | 57.6 ± 2.5   | 71.1 ± 1.6   |
| <b>S9</b>  | 38.0 ± 1.2           | 79.1 ± 1.4   | 62.5 ± 3.6   | 79.6 ± 1.4   |
| <b>S10</b> | 9.3 ± 1.4            | 25.4 ± 2.3   | 1.8 ± 0.3    | 6.6 ± 1.4    |
| <b>S11</b> | 54.4 ± 2.6           | 72.7 ± 2.2   | 28.8 ± 2.3   | 70.2 ± 3.0   |
| <b>S12</b> | 29.0 ± 2.0           | 67.6 ± 2.0   | 33.5 ± 2.0   | 75.7 ± 2.1   |
| <b>S13</b> | 63.6 ± 2.2           | 65.4 ± 2.3   | 53.4 ± 1.7   | 69.2 ± 2.5   |
| <b>S14</b> | 65.4 ± 2.9           | 76.5 ± 1.8   | 71.3 ± 1.6   | 75.2 ± 1.5   |
| <b>S15</b> | 34.4 ± 2.5           | 44.4 ± 1.2   | 27.9 ± 1.4   | 3.4 ± 0.4    |
| <b>S16</b> | 50.0 ± 1.3           | 72.5 ± 2.6   | 40.0 ± 2.0   | 62.5 ± 2.3   |
